# Supplementary material for: Functional Evolution of a Multigene Family: Orthologous and Paralogous Pheromone Receptor Genes in the Turnip Moth, Agrotis segetum
Source: PubMed Central journal article supplement (PMC3795068; doi:10.1371/journal.pone.0077345), 2013-10-10
Supplement: pone.0077345.s003.pdf [file pone.0077345.s003.pdf]

**Table S2. GenBank accession nos of the PRs used in the phylogenetic tree.**

| <b>PR protein name</b>              | <b>Accession no.</b> |
|-------------------------------------|----------------------|
| <b><u>Agrotis segetum</u></b>       |                      |
| AsegOR1                             | KC526965             |
| AsegOR2                             | KC526966             |
| AsegOR3                             | KC526967             |
| AsegOR4                             | KC526968             |
| AsegOR5                             | KC526969             |
| AsegOR6                             | KC526970             |
| AsegOR7                             | KC526971             |
| AsegOR8                             | KC526972             |
| AsegOR9                             | KC526973             |
| <b><u>Heliothis virescens</u></b>   |                      |
| HvOR11                              | CAG38112.1           |
| HvOR13                              | CAG38114.1           |
| HvOR14                              | CAG38115.1           |
| HvOR16                              | CAG38117.1           |
| <b><u>Bombyx mori</u></b>           |                      |
| BmOR1                               | BAD69584             |
| BmOR3                               | BAD89567             |
| <b><u>Plutella xylostella</u></b>   |                      |
| PxOR1                               | BAG71420.1           |
| <b><u>Mythimna separata</u></b>     |                      |
| MsOR1                               | BAG71414.1           |
| <b><u>Diaphania indica</u></b>      |                      |
| DiOR1                               | BAG71417.1           |
| <b><u>Ostrinia scapulalis</u></b>   |                      |
| OscAOR1                             | BAH57975.1           |
| OscAOR3                             | BAI66604.1           |
| OscAOR4                             | BAI66605.1           |
| <b><u>Ostrinia nubilalis</u></b>    |                      |
| OnOR1                               | ADB89178.1           |
| OnOR3                               | ADB89180.1           |
| OnOR5                               | ADB89182.1           |
| OnOR6                               | ADB89183.1           |
| <b><u>Antheraea polyphemus</u></b>  |                      |
| ApolOR1                             | CBH19582.1           |
| <b><u>Spodoptera littoralis</u></b> |                      |
| SlitOR6                             | ACL81183.1           |
| <b><u>Amyelois transitella</u></b>  |                      |
| AtraOR1                             | AFP54146.1           |
| AtraOR3                             | AFP54147.1           |
| <b><u>Helicoverpa armigera</u></b>  |                      |
| HarmOR1                             | ACS45304             |
| HarmOR2                             | ACS45305             |
| HarmOR3                             | ACS45306             |
| <b><u>Helicoverpa assulta</u></b>   |                      |
| HassOR1                             | ACS45307             |
| HassOR2                             | ACS45308             |
| HassOR3                             | ACS45309             |

---

**Orco lineage**

|           |            |
|-----------|------------|
| Aseg\Orco | KC526964   |
| HvOR2     | CAD31851.1 |
| BmOR2     | BAD69585   |
| PxOR2     | BAG71421.2 |
| MsOR2     | BAG71415.1 |
| DiOR2     | BAG71418.1 |
| OscAOR2   | BAH57973.1 |
| OnOR2     | ADB89179.1 |
| Slit\Orco | ABQ82137.1 |
| Atra\Orco | AFP54145.1 |
| Harm\Orco | HQ186284   |
| Hass\Orco | HQ186285   |

---
